# Supplementary material
Source: Springer Nature journal article supplement (https://www.springermedizin.de/resource/supplementary/13063_2005_130_MOESM5_ESM.pdf/9427516)

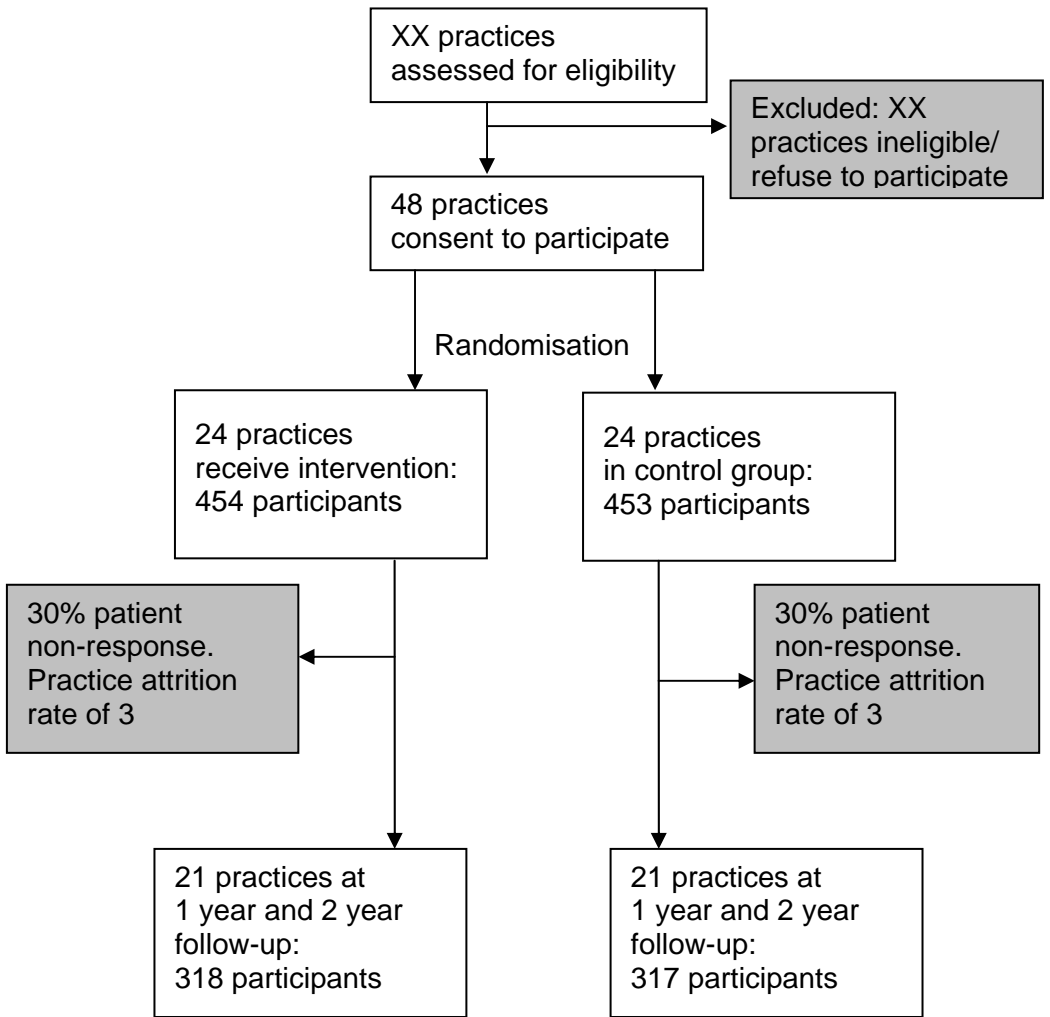

Supplement: MOESM5 [file 9427516]
